# Supplementary material for: Synthesis of stable nonaromatic phenothiazinophyrins
Source: Royal Society of Chemistry journal article supplement (doi:10.1039/d3ob00778b), 2023-01-01
Supplement: d3ob00778b1.pdf [file d3ob00778b1.pdf]

## Synthesis of Stable Nonaromatic Phenothiazinophyrins

Neha Tripathi, Avisikta Sinha and Mangalampalli Ravikanth\*

Department of Chemistry, Indian Institute of Technology Bombay, Powai, Mumbai 400076,

India, E-mail: [ravikanth@chem.iitb.ac.in](mailto:ravikanth@chem.iitb.ac.in)

| Sr. no | Details                                                                                                                           | Page no. |
|--------|-----------------------------------------------------------------------------------------------------------------------------------|----------|
| 1      | General Experimental Section                                                                                                      | S2       |
| 2      | <b>Figures S1-S20.</b> Characterization (HRMS and NMR) data for compounds <b>2-4</b> .                                            | S3-S22   |
| 3      | <b>Figure S21-S23.</b> The absorption spectra and redox data of Compounds <b>2-4</b> .                                            | S23-S25  |
| 4      | <b>Table S1.</b> Selected TD-DFT calculated oscillator strengths and compositions of the major electronic transitions of <b>2</b> | S26      |
| 5      | <b>Table S2.</b> Cartesian coordinate of the optimized ( $S_0$ ) geometries of the compound <b>2</b>                              | S27-S28  |
| 6      | References                                                                                                                        | S29      |

## Experimental Section

**General Information:** All chemicals including Boron trifluoride etherate ( $\text{BF}_3 \cdot \text{OEt}_2$ ), 2, 3-dichloro-5, 6-dicyano-1, 4- benzoquinone (DDQ) were procured from Aldrich and used as received. Basic alumina and silica gel (60-120 mesh) column chromatographic methods were used for purification purposes. Reported methods were used for the synthesis of compounds, **5**, **6**, and **7**.<sup>1-5</sup> The  $^1\text{H}$  &  $^{13}\text{C}$  NMR spectra were recorded in  $\text{CDCl}_3$  on Bruker 400 and 500 MHz instruments. The  $^{13}\text{C}$  NMR frequencies are 125.77 and 100.06 MHz for 500 MHz and 400 MHz instruments respectively. Shimadzu UV-Visible-NIR Spectrophotometer was used for carrying out absorption spectral studies. Cyclic voltammetry (CV) studies were performed with BAS electrochemical system with the three-electrode configuration comprising of a saturated calomel electrode (reference electrode), glassy carbon (working electrode), (auxiliary electrode) and  $10^{-3}$  M of the analyte. Bruker maXis Impact and Q-TOF micro mass spectrometer instrument was used for recording HR mass spectra.

**Computational information:** For all the calculations Gaussian 09 program package was used. The density functional theory (DFT)<sup>7</sup> method, hybrid functional B3LYP in conjunction with basis set 6-31G(d,p)<sup>8</sup> helped to optimize the structure of compound **2** ( $\text{S}_0$ ) states. To obtain the oscillator strengths, identical basis and functional hybrid set were used whereas the vertical excitation energies were obtained by the help of TD-DFT techniques for  $\text{S}_0 \rightarrow \text{S}_n$  transitions.<sup>9</sup> Under the Polarizable Continuum Model (PCM)<sup>10</sup> in the toluene media all the computations were done using the Self-Consistent Reaction Field (SCRF). The electronic absorption spectra as well as the oscillator strengths were thoroughly examined using TD-DFT with PCM model based on the optimized structures in the  $\text{S}_0$  state.

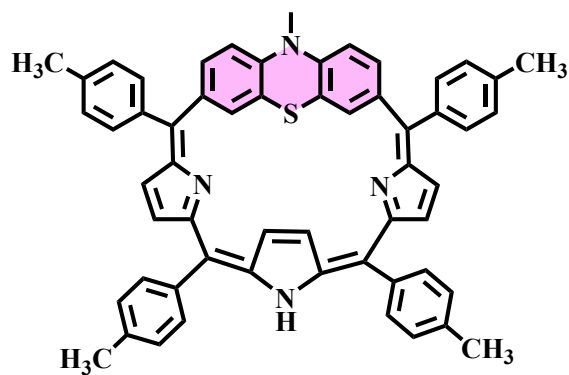

Compound 2

Department of Chemistry I.I.T. (B)

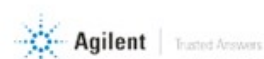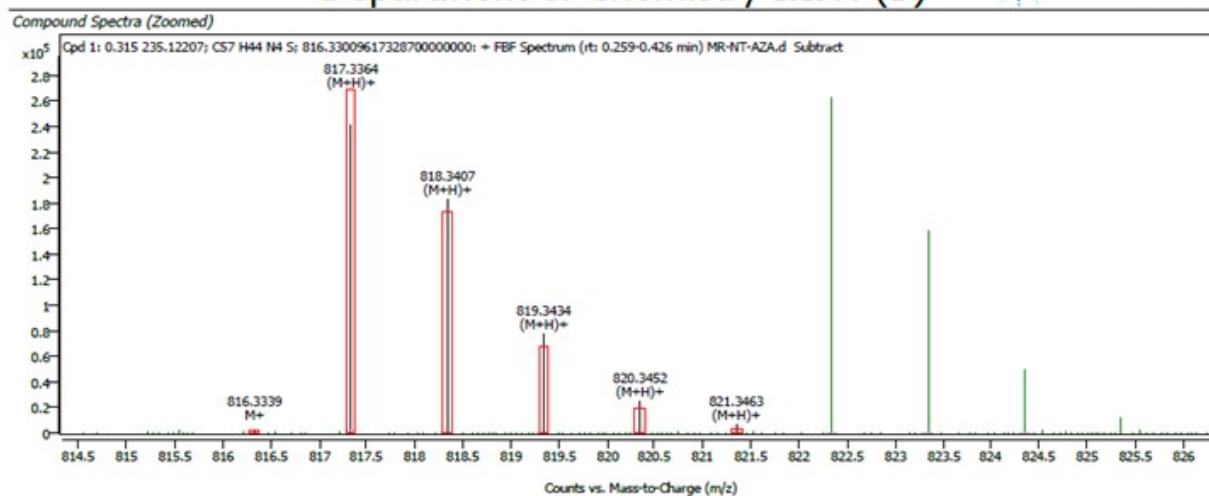

## Compound Details

Cpd. 1: C57 H44 N4 S

| Formula      | m/z      | Observed M/Z     | Difference Da    | Difference PPM   | Score |
|--------------|----------|------------------|------------------|------------------|-------|
| C57 H44 N4 S | 817.3364 | 817.336389123915 | 1.42801008701099 | 1.74930777602619 | 91.97 |

Figure S1. HR mass spectrum of compound 2.

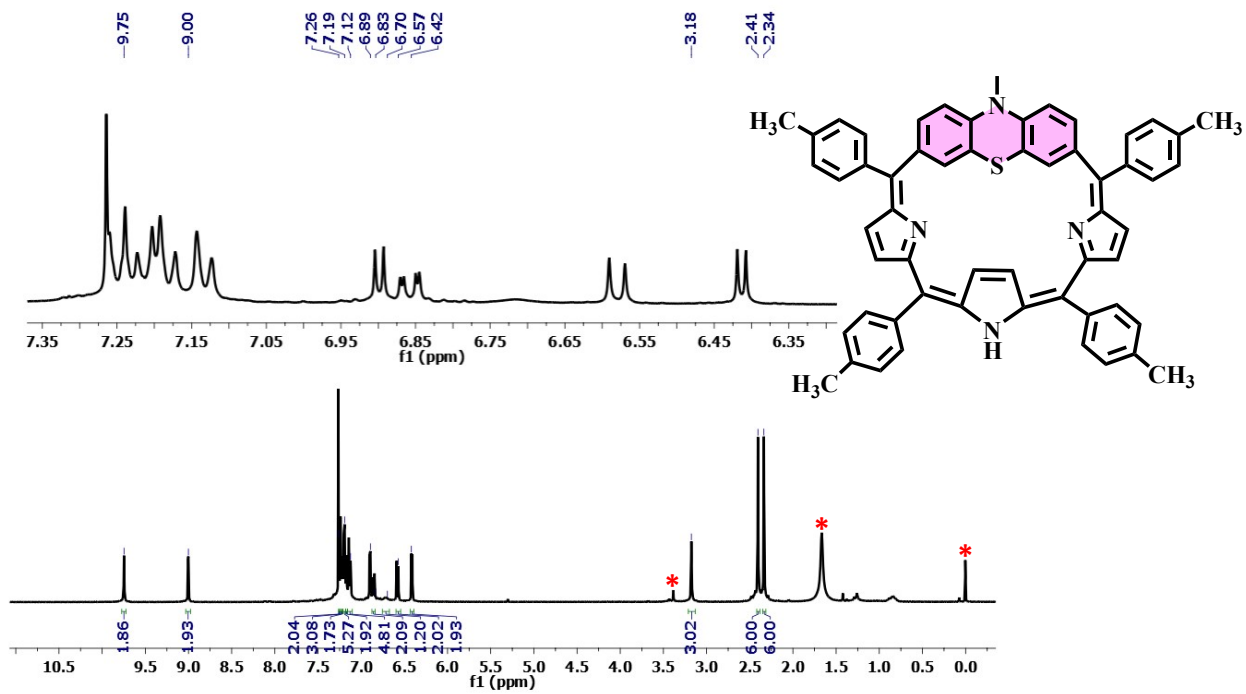

**Figure S2.**  $^1\text{H}$  NMR spectrum of the compound **2** recorded in  $\text{CDCl}_3$  on 400 MHz NMR instrument. Expansion of aromatic region is given as an inset. Note: Peaks marked with asterisk (\*) are due to residual solvents.

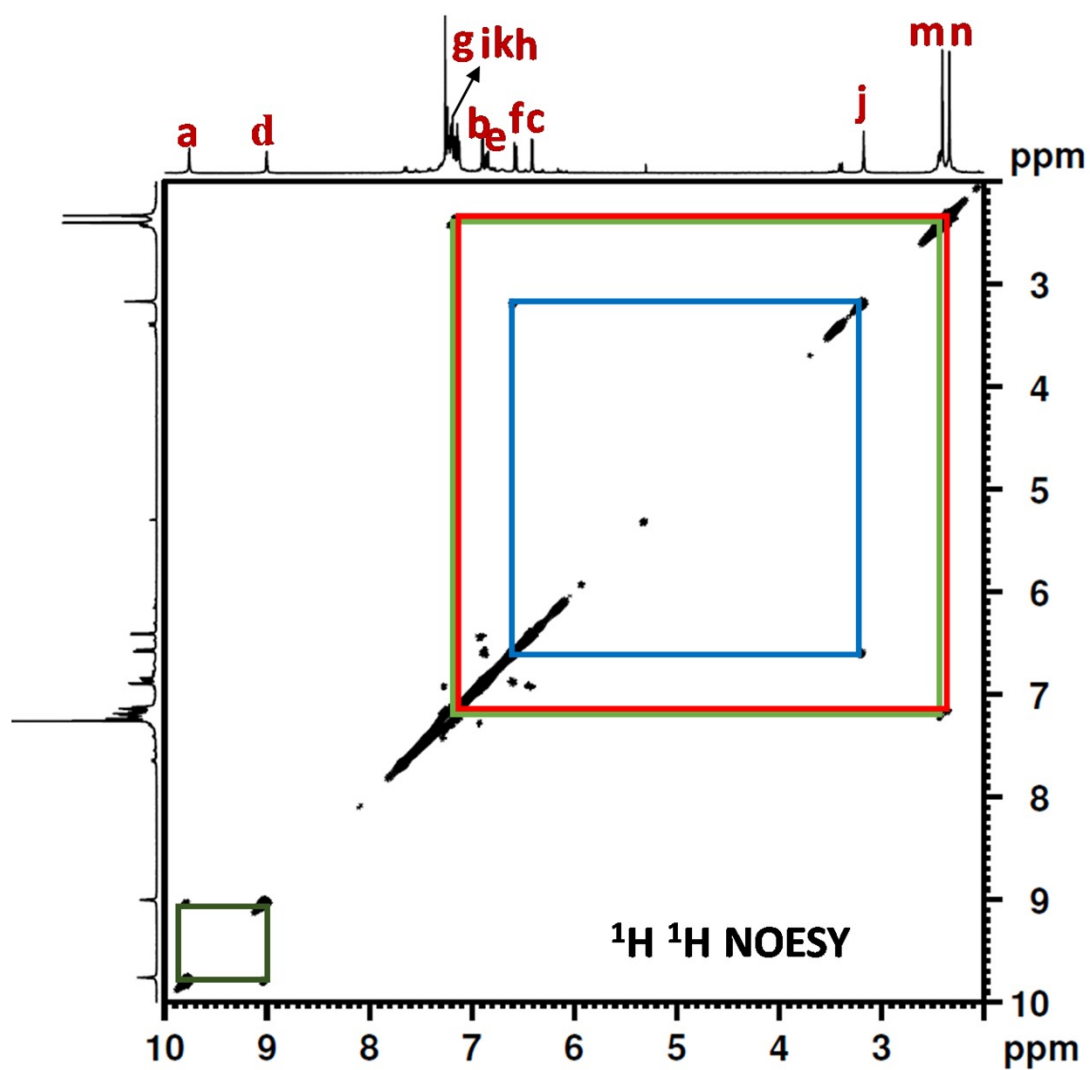

Figure S3.  $^1\text{H}$ - $^1\text{H}$  NOESY of compound 2 recorded in  $\text{CDCl}_3$  at 25 °C.

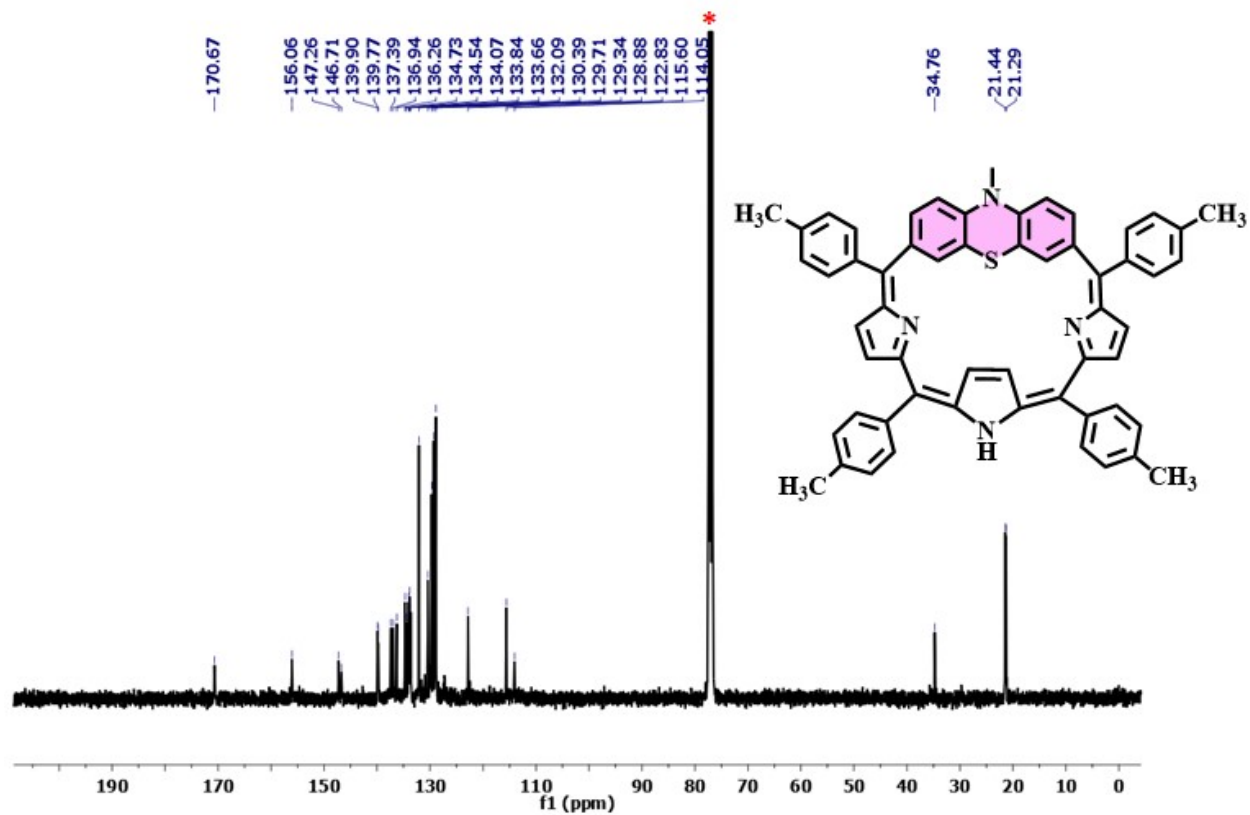

**Figure S4.**  $^{13}\text{C}\{^1\text{H}\}$  NMR spectrum of the compound **2** recorded in  $\text{CDCl}_3$  on 100.06 MHz NMR instrument; Note: Peaks marked with asterisk (\*) are due to residual solvents.

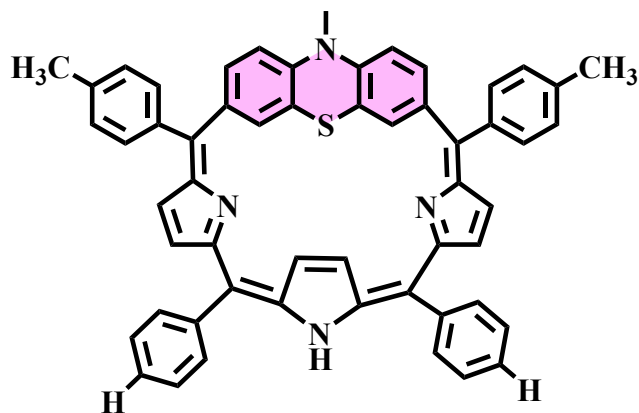

Compound 3

**Analysis Info**

Analysis Name D:\Data\MAR-2023\MR-NT-AZA-T2.d  
 Method Naformat\_pos\_1000a.m  
 Sample Name MR-NT-AZA-T2  
 Comment C55H40N4S

Acquisition Date 3/6/2023 12:18:25 PM

Operator PG SRD OUT  
 Instrument maXis impact 282001.00081

**Acquisition Parameter**

|             |            |                      |          |                  |           |
|-------------|------------|----------------------|----------|------------------|-----------|
| Source Type | ESI        | Ion Polarity         | Positive | Set Nebulizer    | 0.3 Bar   |
| Focus       | Not active | Set Capillary        | 3700 V   | Set Dry Heater   | 180 °C    |
| Scan Begin  | 50 m/z     | Set End Plate Offset | -500 V   | Set Dry Gas      | 4.0 l/min |
| Scan End    | 1000 m/z   | Set Charging Voltage | 2000 V   | Set Divert Valve | Source    |
|             |            | Set Corona           | 0 nA     | Set APCI Heater  | 0 °C      |

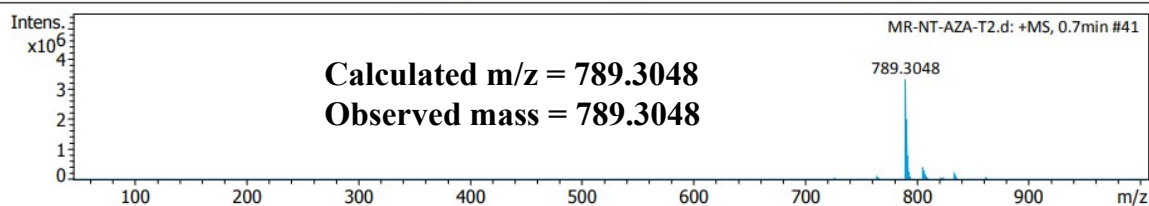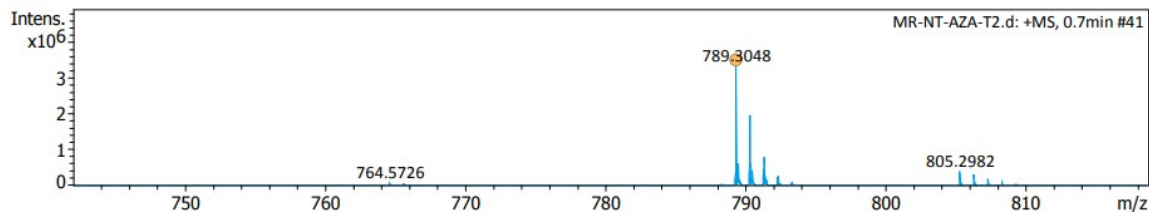

| Meas. m/z | # | Ion Formula | m/z      | err [ppm] | mSigma | # mSigma | Score  | rdb  | e <sup>-</sup> Conf | N-Rule |
|-----------|---|-------------|----------|-----------|--------|----------|--------|------|---------------------|--------|
| 789.3048  | 1 | C55H41N4S   | 789.3046 | -0.2      | 13.9   | 1        | 100.00 | 40.0 | even                | ok     |

Figure S5. HR mass spectrum of compound 3.

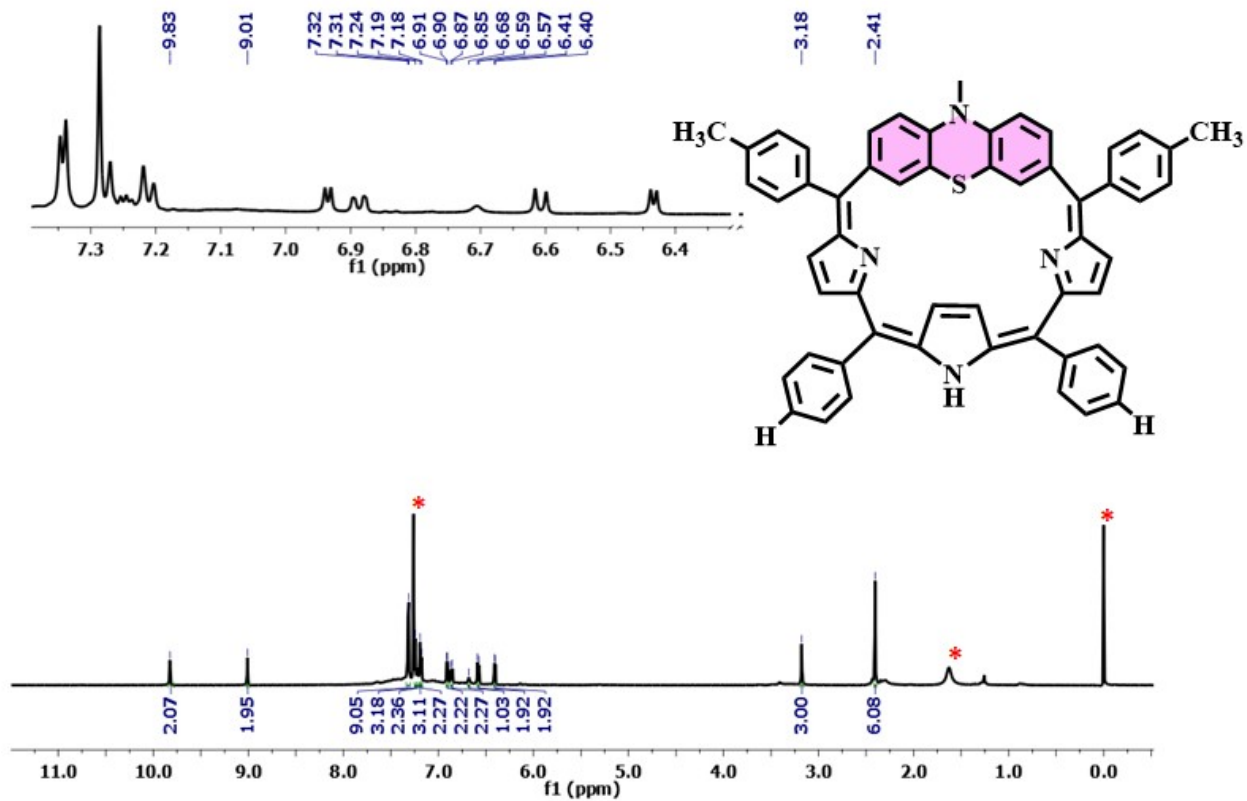

**Figure S6.** <sup>1</sup>H NMR spectrum of the compound **3** recorded in CDCl<sub>3</sub> on 500 MHz NMR instrument. Expansion of aromatic region is given as an inset. Note: Peaks marked with asterisk (\*) are due to residual solvents.



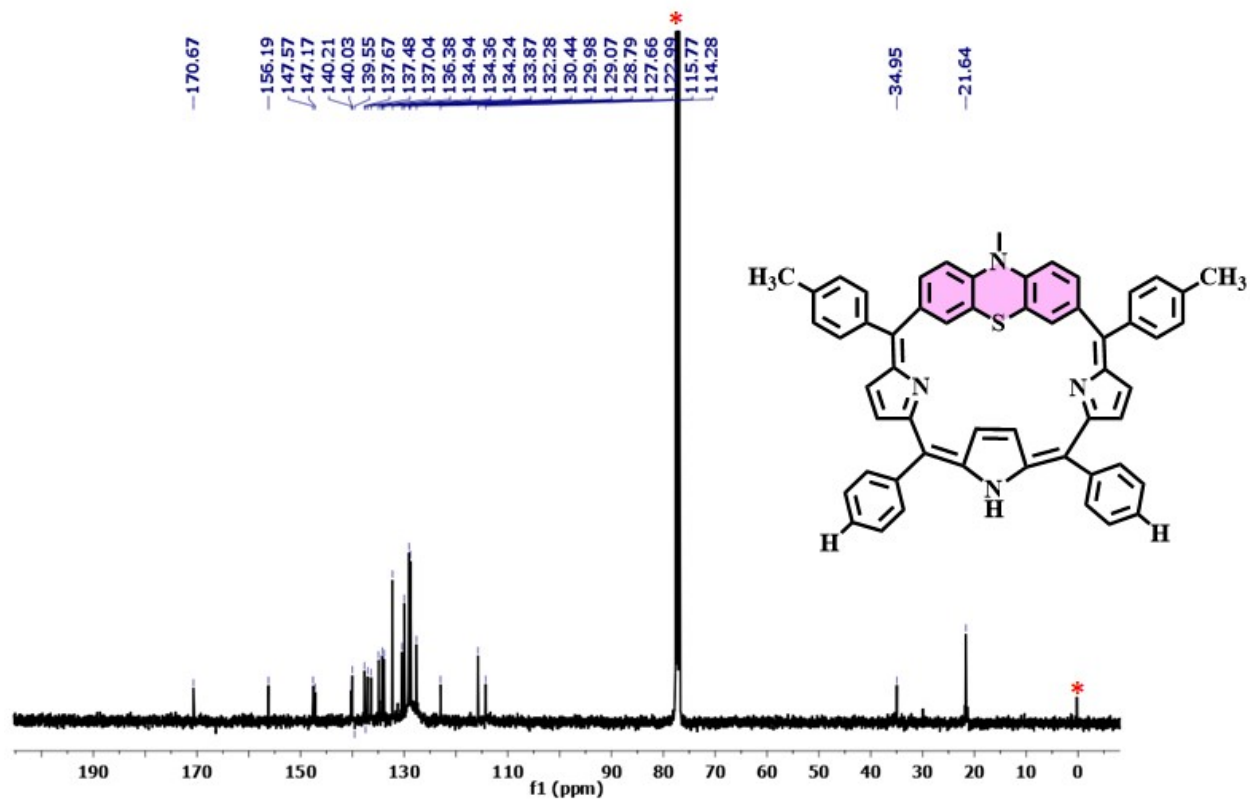

**Figure S7.**  $^{13}\text{C}\{^1\text{H}\}$  NMR spectrum of the compound **3** recorded in  $\text{CDCl}_3$  on 100.06 MHz

NMR instrument; Note: Peaks marked with asterisk (\*) are due to residual solvents.

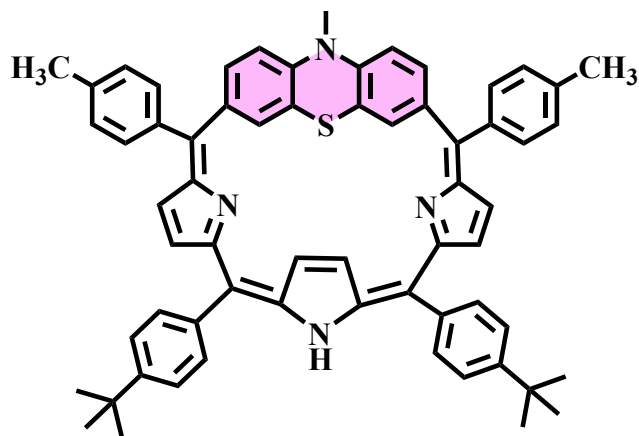

Compound 4

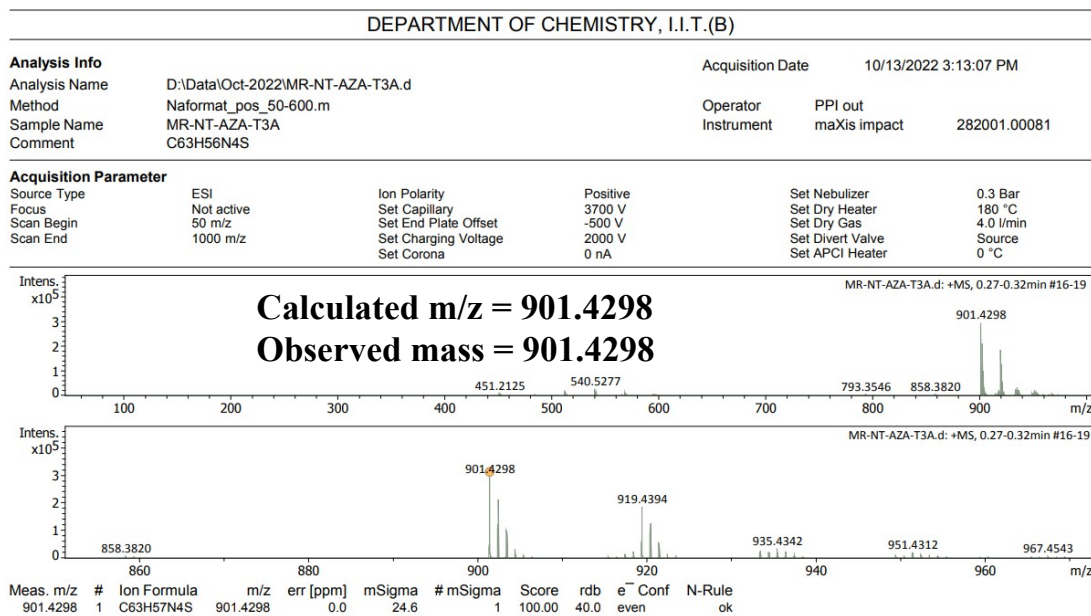

Figure S8. HR mass spectrum of compound 4.

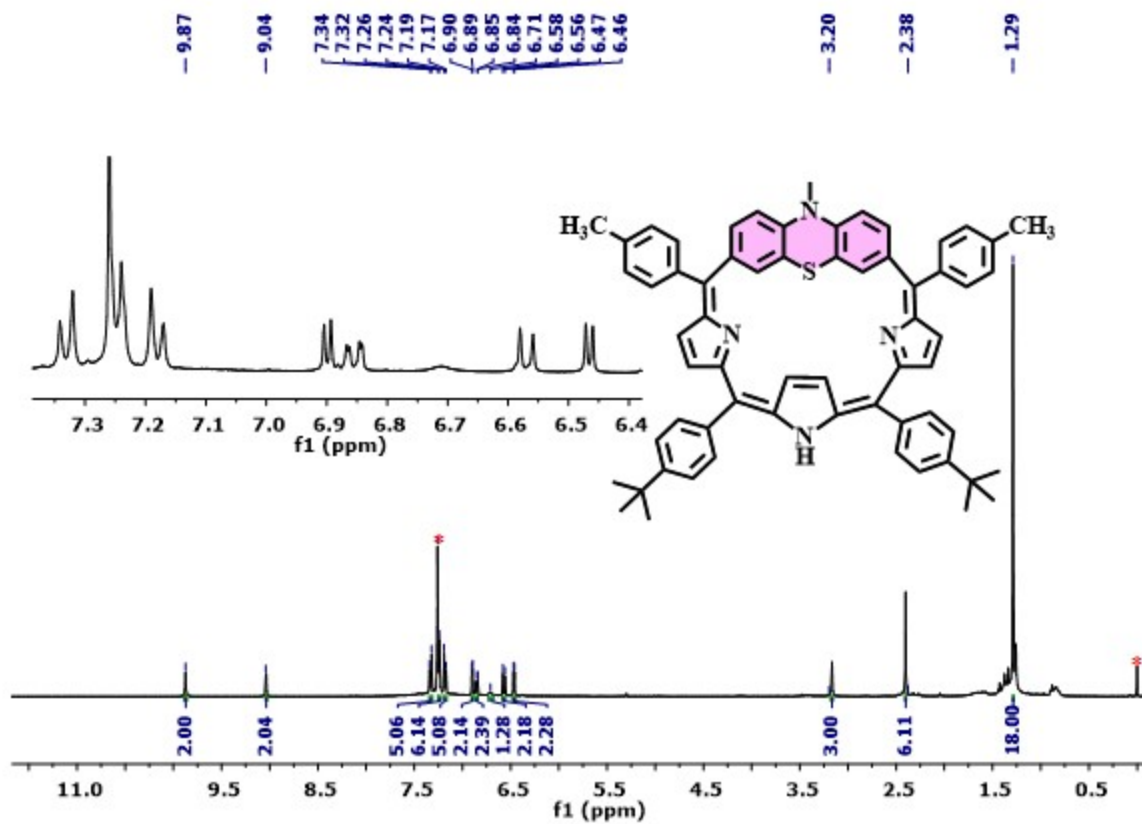

**Figure S9.** <sup>1</sup>H NMR spectrum of the compound 4 recorded in CDCl<sub>3</sub> on 500 MHz NMR instrument. Expansion of aromatic region is given as an inset. Note: Peaks marked with asterisk (\*) are due to residual solvents.

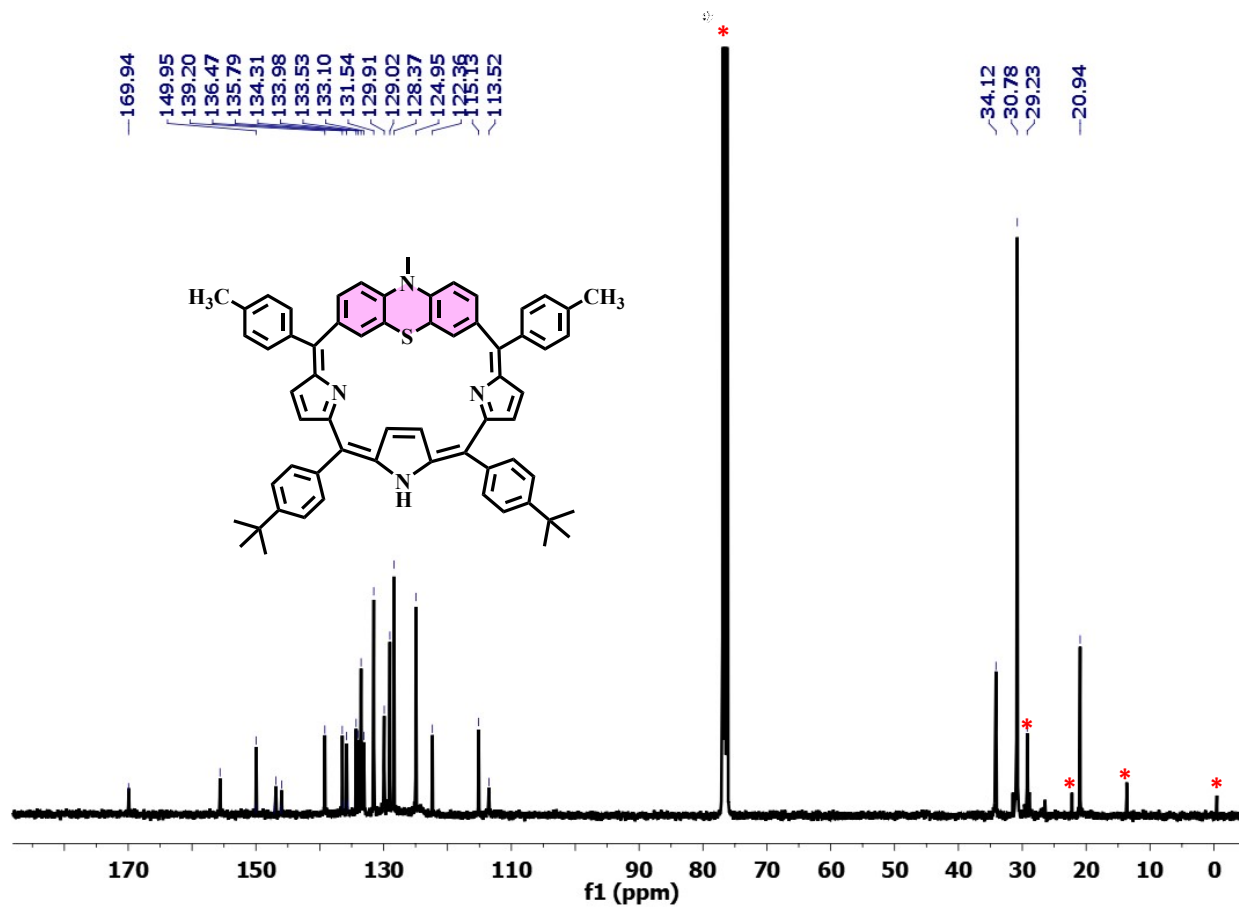

**Figure S10.**  $^{13}\text{C}\{^1\text{H}\}$  NMR spectrum of the compound 4 recorded in  $\text{CDCl}_3$  on 125.77 MHz NMR instrument; Note: Peaks marked with asterisk (\*) are due to residual solvents.

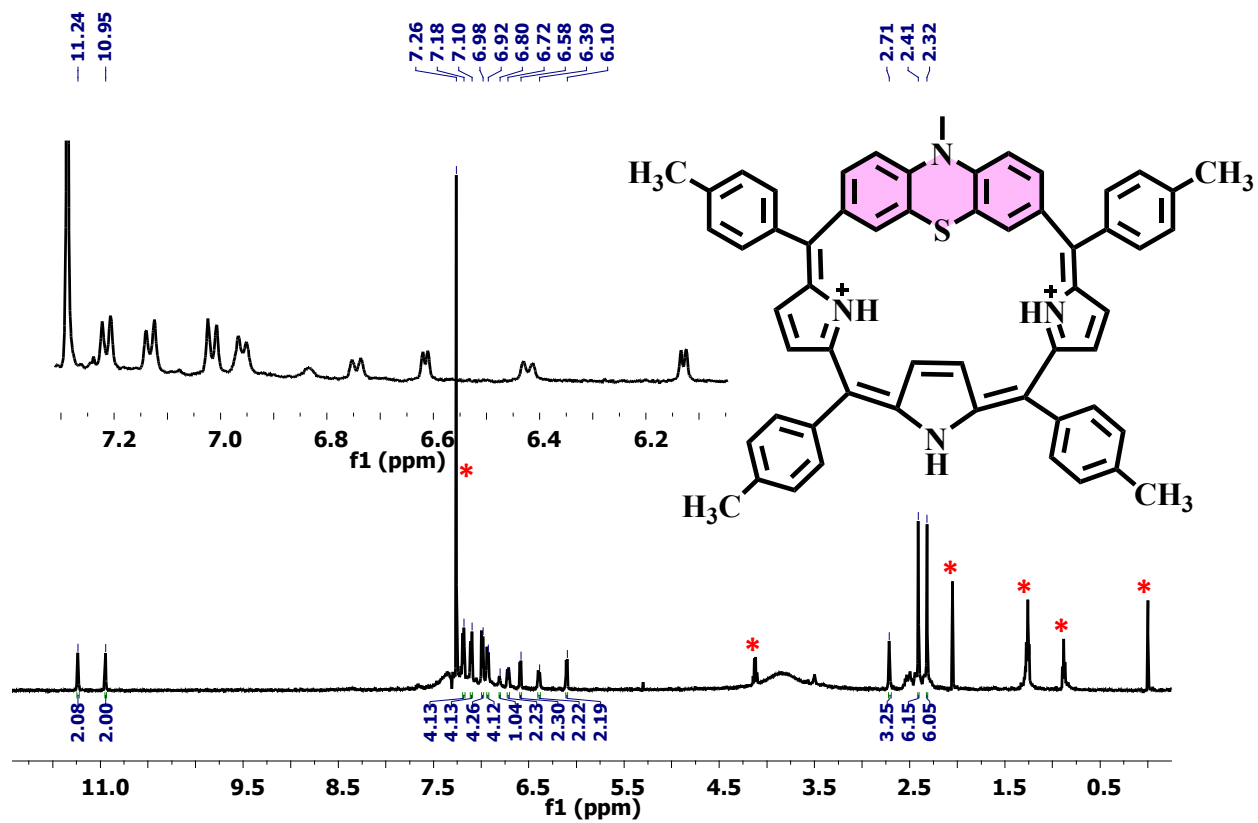

**Figure S11.** <sup>1</sup>H NMR spectrum of the compound **2.2H<sup>+</sup>** recorded in CDCl<sub>3</sub> on 400 MHz NMR instrument. Expansion of aromatic region is given as an inset. Note: Peaks marked with asterisk (\*) are due to residual solvents

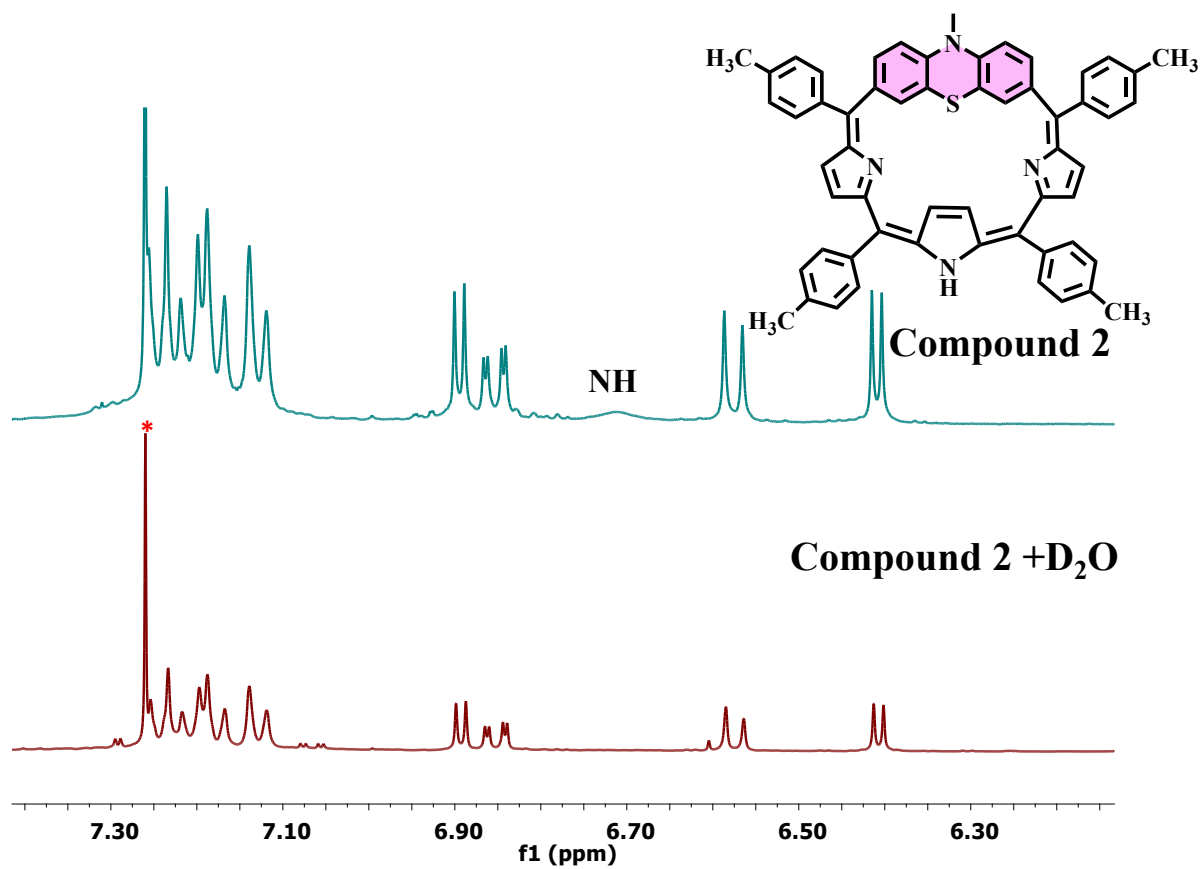

**Figure S12.** Comparison of partial <sup>1</sup>H NMR spectrum of the compound **2** recorded in CDCl<sub>3</sub> and D<sub>2</sub>O exchange experiment of compound **2** on 400 MHz NMR instrument. Note: Peaks marked with asterisk (\*) are due to residual solvents

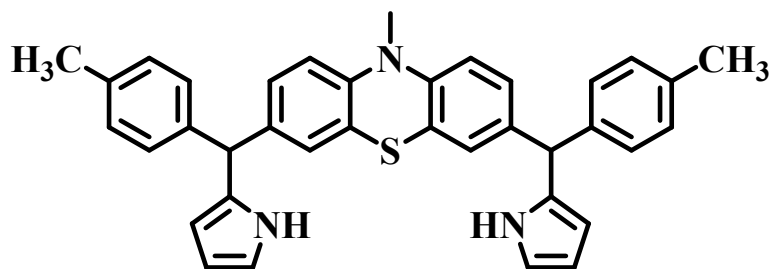

Compound 5

## Acquisition Parameter

|             |            |                      |          |                  |           |
|-------------|------------|----------------------|----------|------------------|-----------|
| Source Type | ESI        | Ion Polarity         | Positive | Set Nebulizer    | 0.3 Bar   |
| Focus       | Not active | Set Capillary        | 3700 V   | Set Dry Heater   | 180 °C    |
| Scan Begin  | 50 m/z     | Set End Plate Offset | -500 V   | Set Dry Gas      | 4.0 l/min |
| Scan End    | 1000 m/z   | Set Charging Voltage | 2000 V   | Set Divert Valve | Source    |
|             |            | Set Corona           | 0 nA     | Set APCI Heater  | 0 °C      |

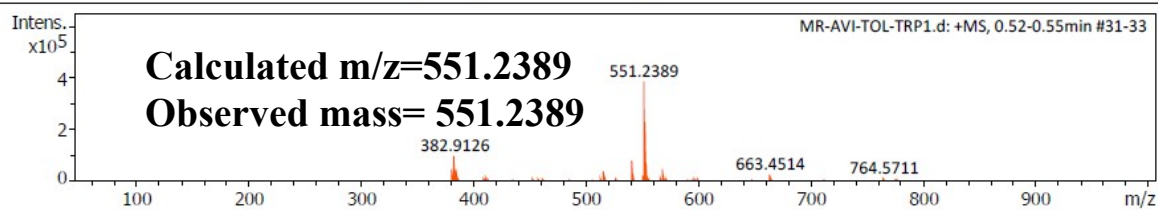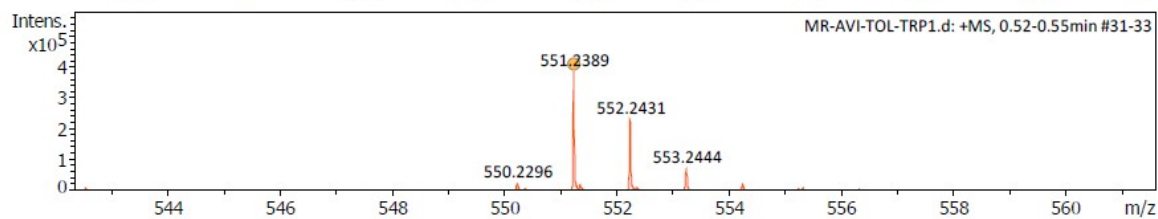

| Meas. m/z | # | Ion Formula | m/z      | err [ppm] | mSigma | # mSigma | Score  | rdb  | e <sup>-</sup> Conf | N-Rule |
|-----------|---|-------------|----------|-----------|--------|----------|--------|------|---------------------|--------|
| 551.2389  | 1 | C37H33N3S   | 551.2390 | 0.2       | 91.6   | 1        | 100.00 | 25.5 | odd                 | ok     |

Figure S13. HR mass spectrum of compound 5.

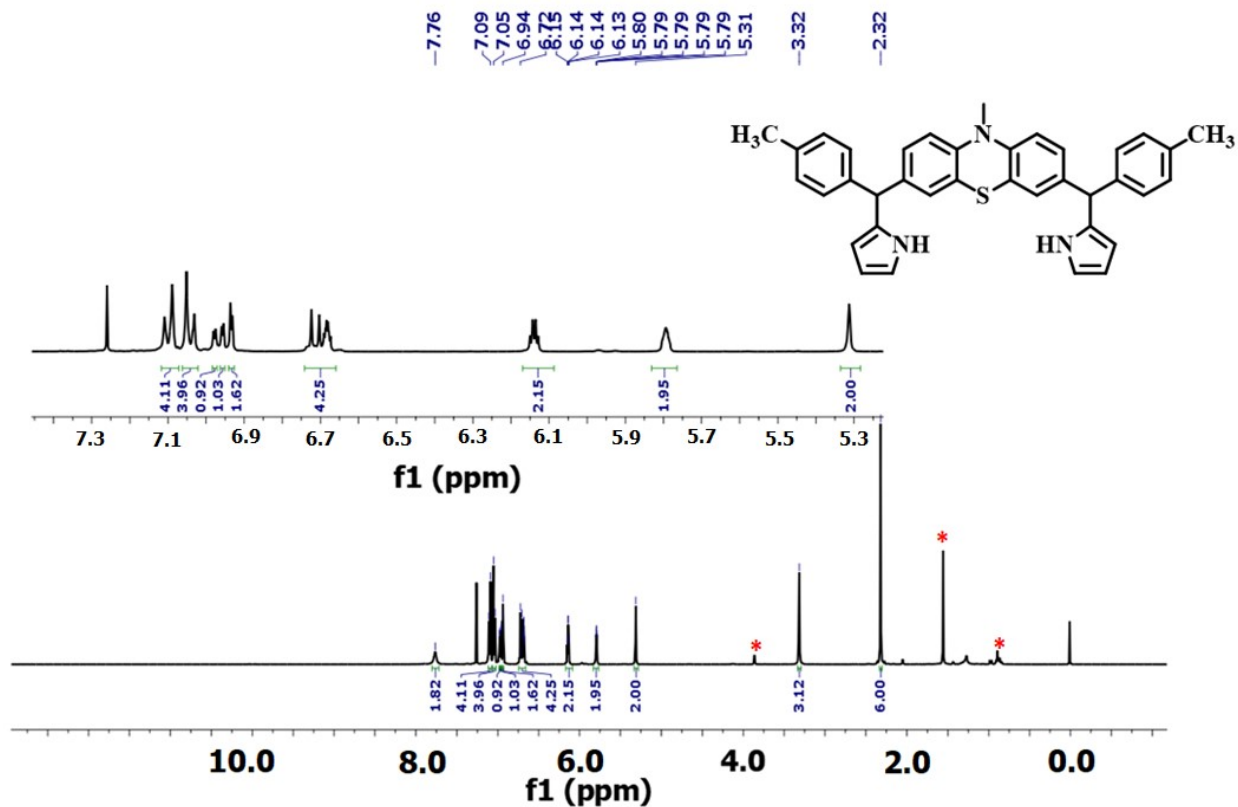

**Figure S14.** <sup>1</sup>H NMR spectrum of the compound **5** recorded in CDCl<sub>3</sub> on 400 MHz NMR instrument. Expansion of aromatic region is given as an inset. Note: Peaks marked with asterisk (\*) are due to residual solvents.<sup>1</sup>



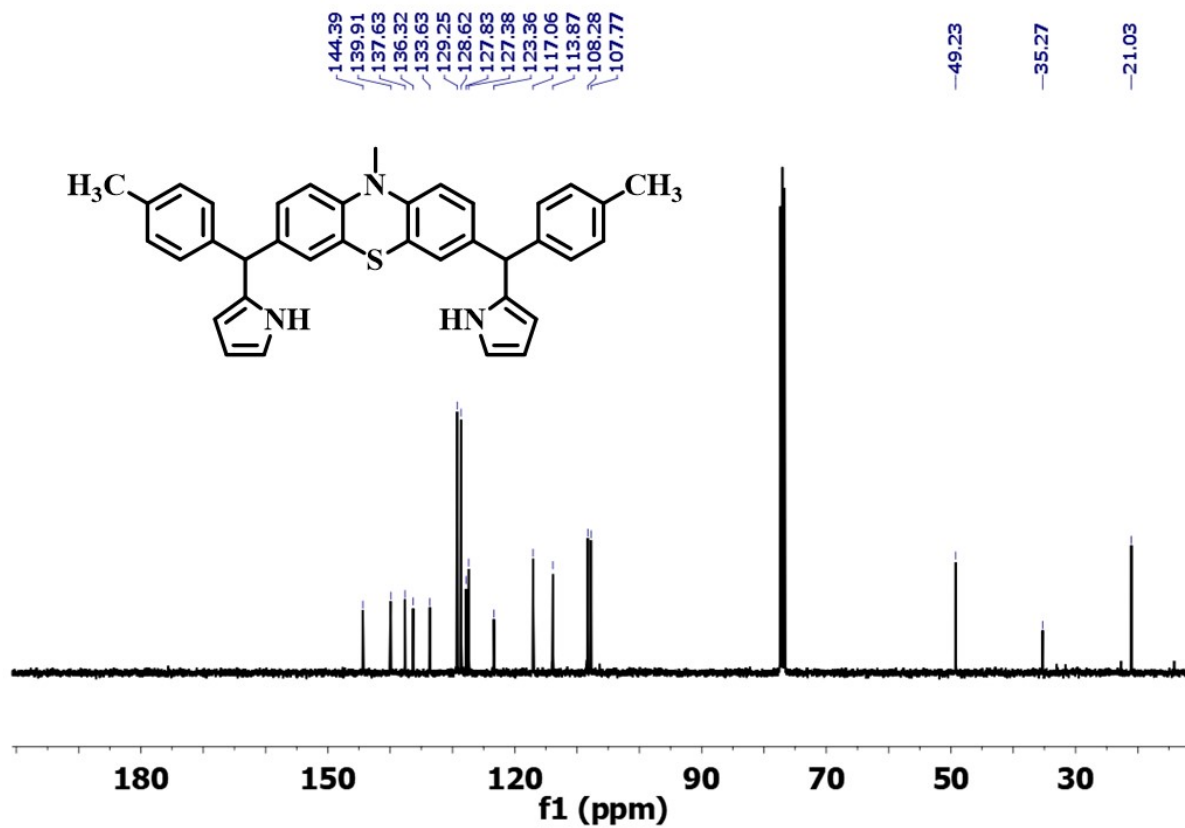

**Figure S15.**  $^{13}\text{C}\{^1\text{H}\}$  NMR spectrum of the compound 5 recorded in  $\text{CDCl}_3$  on 100.06 MHz NMR instrument.<sup>1</sup>

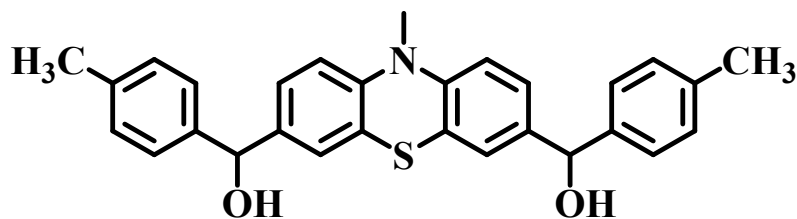

Compound 6

## Acquisition Parameter

|             |            |                      |          |                  |           |
|-------------|------------|----------------------|----------|------------------|-----------|
| Source Type | ESI        | Ion Polarity         | Positive | Set Nebulizer    | 0.3 Bar   |
| Focus       | Not active | Set Capillary        | 3700 V   | Set Dry Heater   | 180 °C    |
| Scan Begin  | 50 m/z     | Set End Plate Offset | -500 V   | Set Dry Gas      | 4.0 l/min |
| Scan End    | 1000 m/z   | Set Charging Voltage | 2000 V   | Set Divert Valve | Source    |
|             |            | Set Corona           | 0 nA     | Set APCI Heater  | 0 °C      |

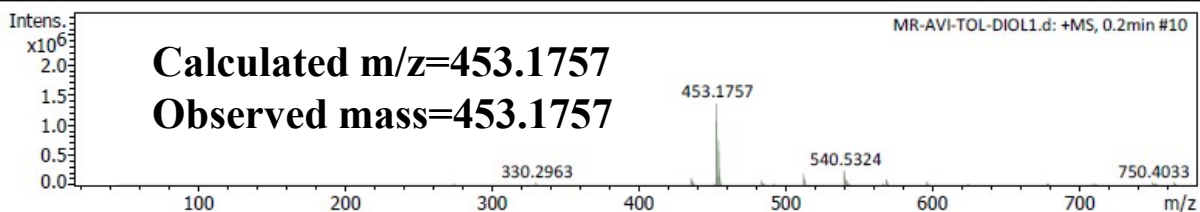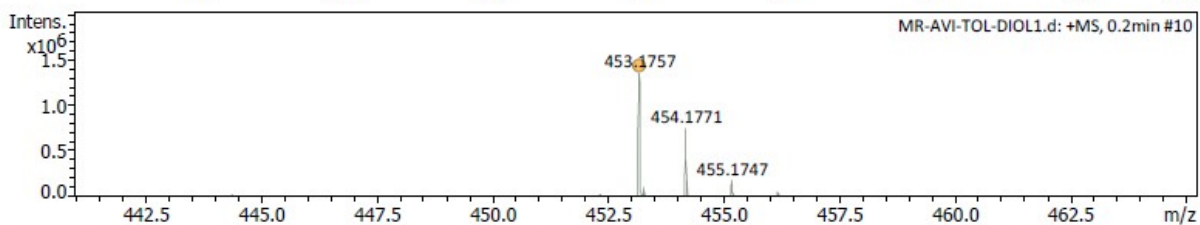

| Meas. m/z | # | Ion Formula                                       | m/z      | err [ppm] | mSigma | # mSigma | Score  | rdb  | e <sup>-</sup> Conf | N-Rule |
|-----------|---|---------------------------------------------------|----------|-----------|--------|----------|--------|------|---------------------|--------|
| 453.1757  | 1 | C <sub>29</sub> H <sub>27</sub> NO <sub>2</sub> S | 453.1757 | 0.1       | 113.7  | 1        | 100.00 | 19.5 | odd                 | ok     |

Figure S16. HR mass spectrum of compound 6.

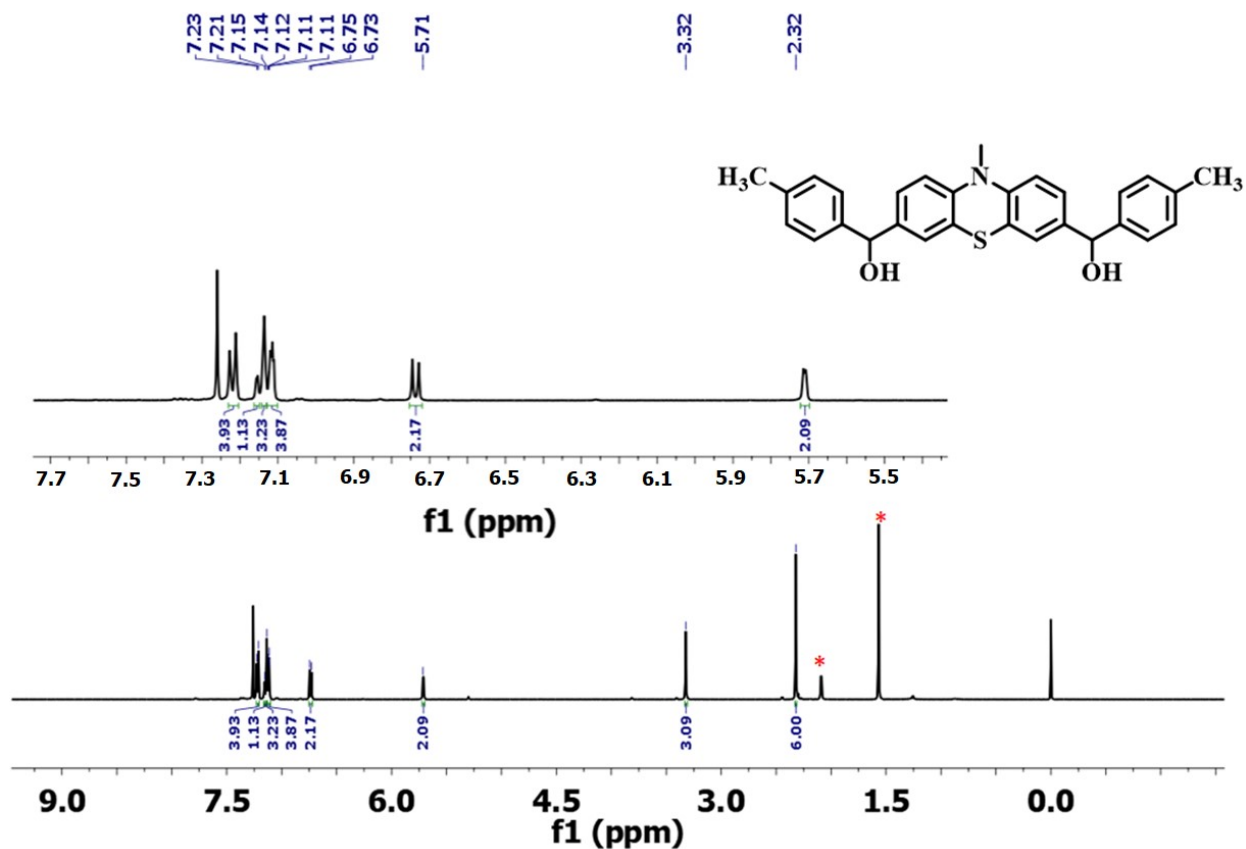

**Figure S17.** <sup>1</sup>H NMR spectrum of the compound **6** recorded in CDCl<sub>3</sub> on 500 MHz NMR instrument. Expansion of aromatic region is given as an inset. Note: Peaks marked with asterisk (\*) are due to residual solvents.<sup>1</sup>

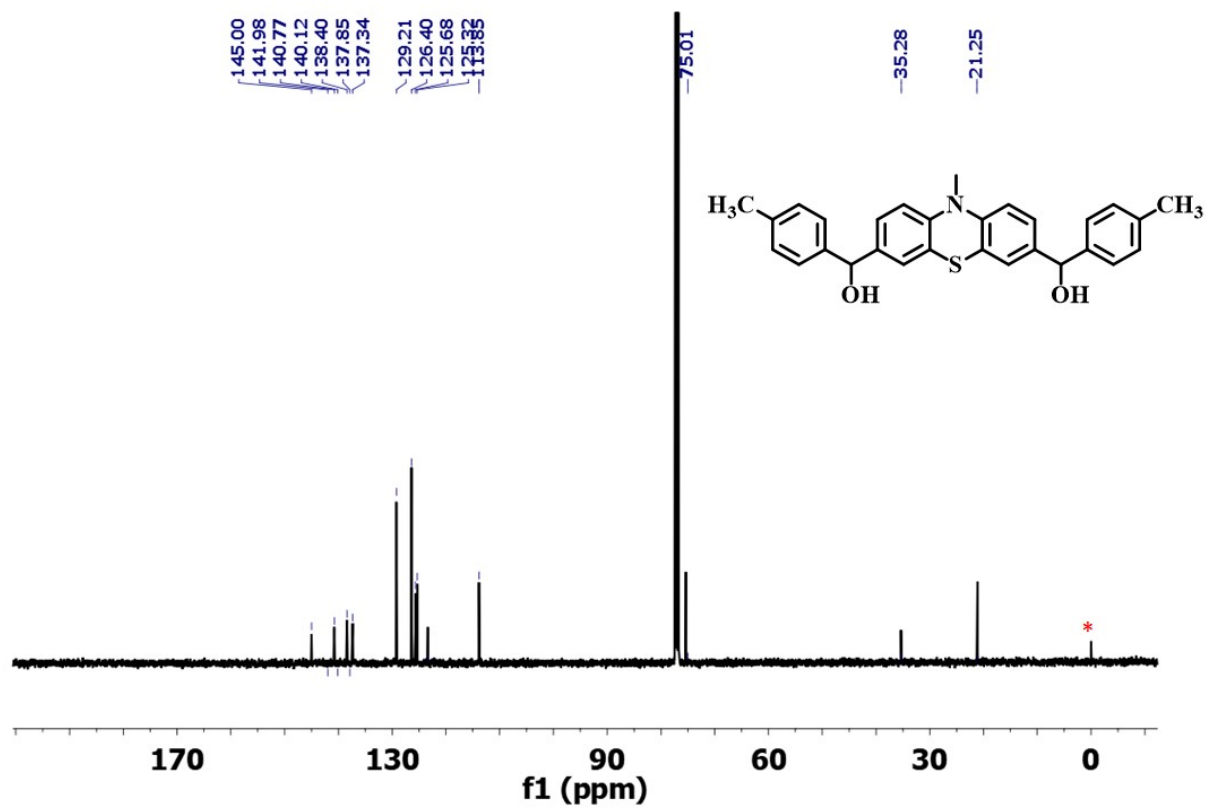

**Figure S18.**  $^{13}\text{C}\{^1\text{H}\}$  NMR spectrum of the compound 6 recorded in  $\text{CDCl}_3$  on 125.77 MHz NMR instrument; Note: Peaks marked with asterisk (\*) are due to residual solvents. <sup>1</sup>

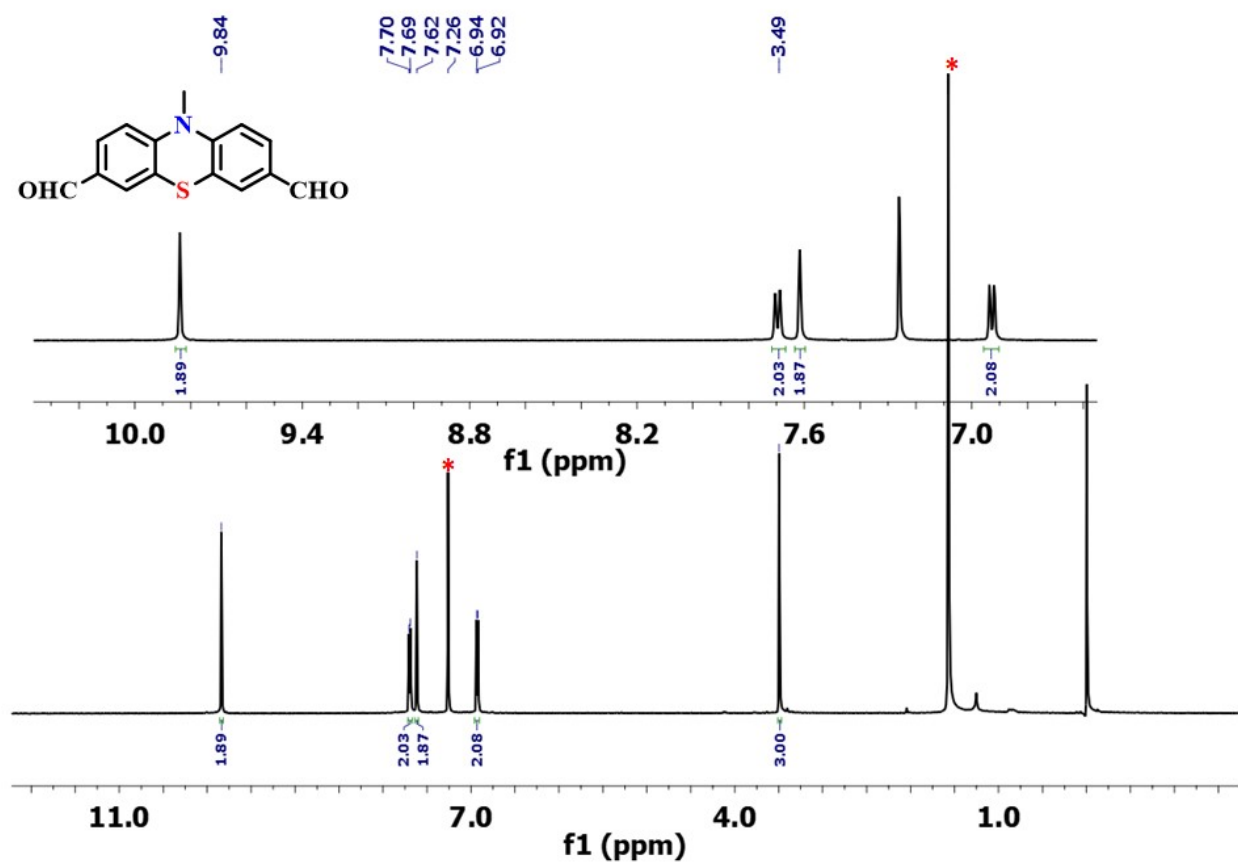

**Figure S19.** <sup>1</sup>H NMR spectrum of the compound 7 recorded in CDCl<sub>3</sub> on 500 MHz NMR instrument. Note: Peaks marked with asterisk (\*) are due to residual solvents.<sup>2</sup>

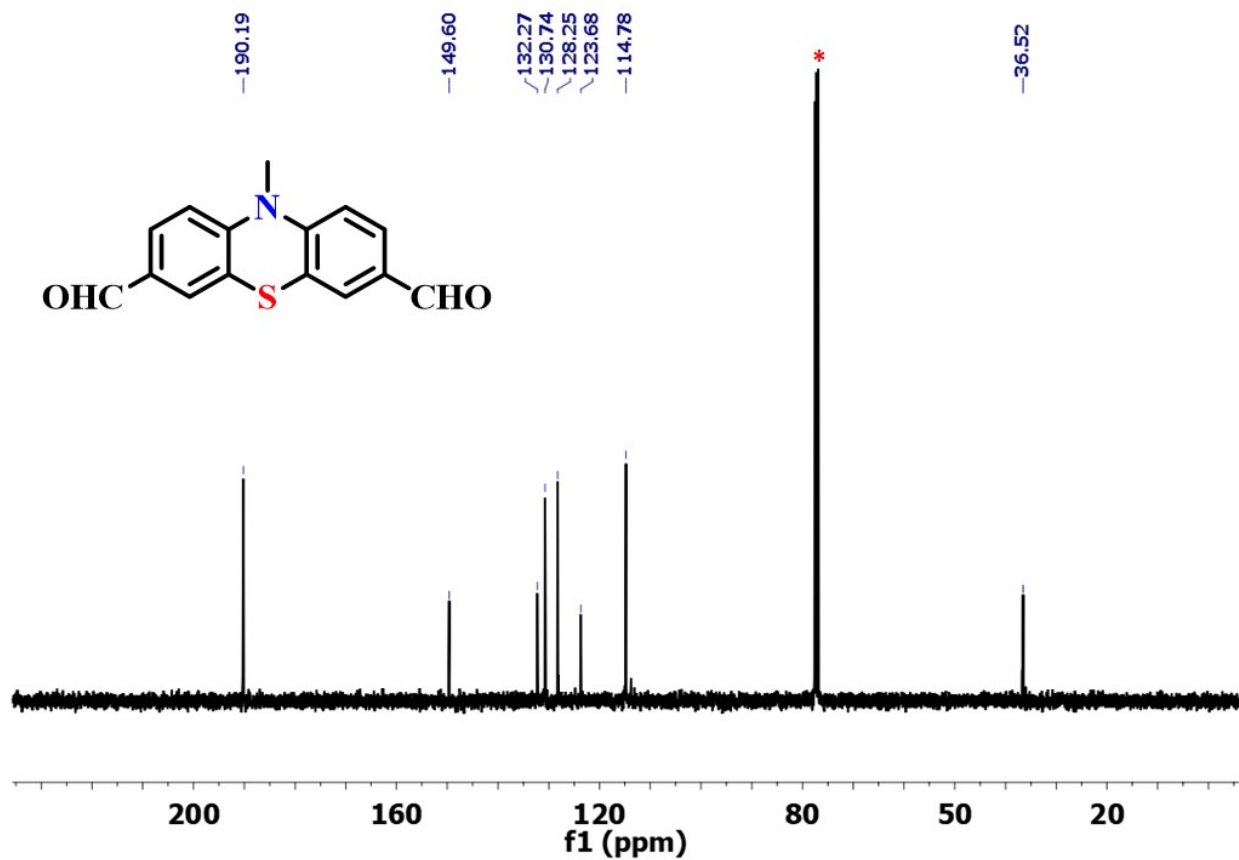

**Figure S20.** <sup>13</sup>C{<sup>1</sup>H} NMR spectrum of the compound 7 recorded in CDCl<sub>3</sub> on 125.77 MHz NMR instrument. Note: Peaks marked with asterisk (\*) are due to residual solvents.<sup>2</sup>

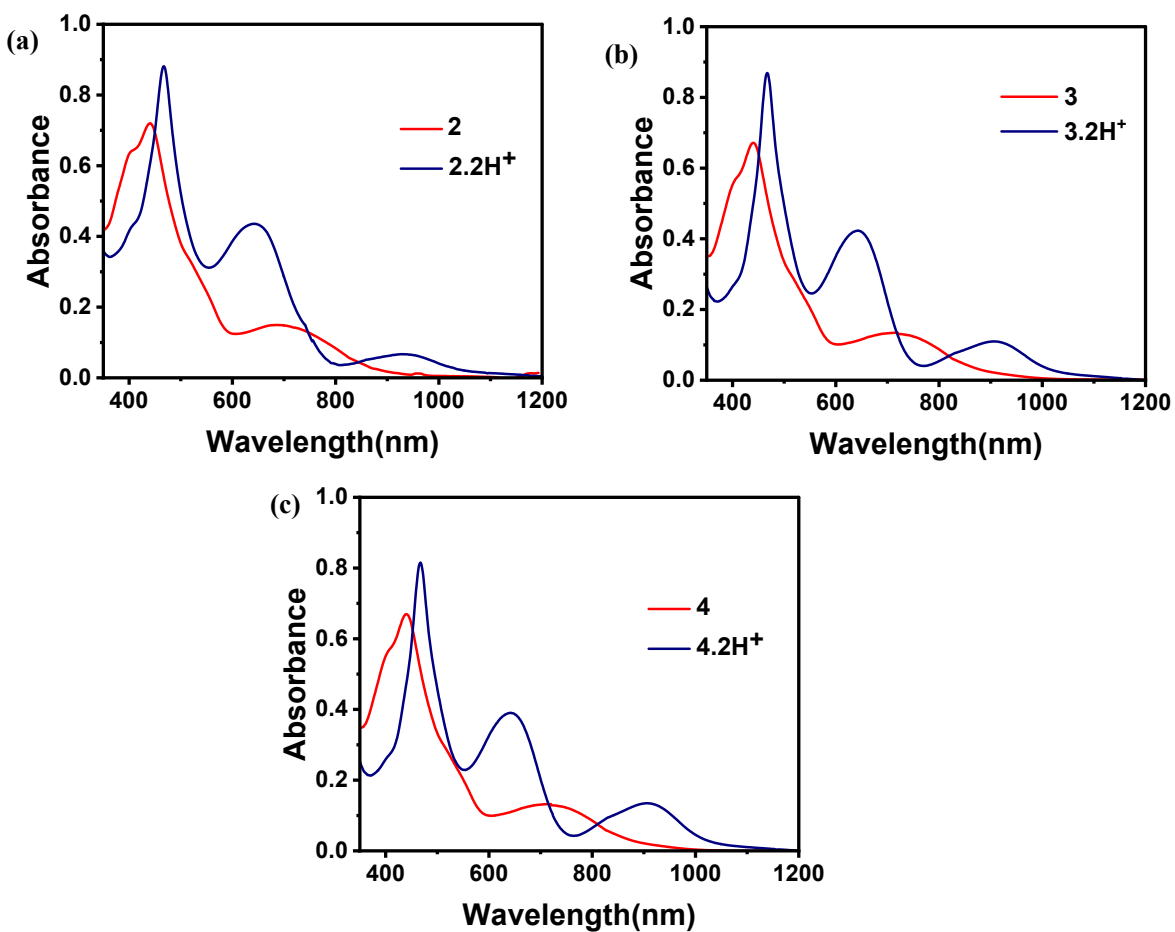

**Figure S21.** Comparison of absorption spectra of the compounds 2-4 ( $10^{-5}$  M) free base and in presence of TFA (excess) recorded in toluene at room temperature.

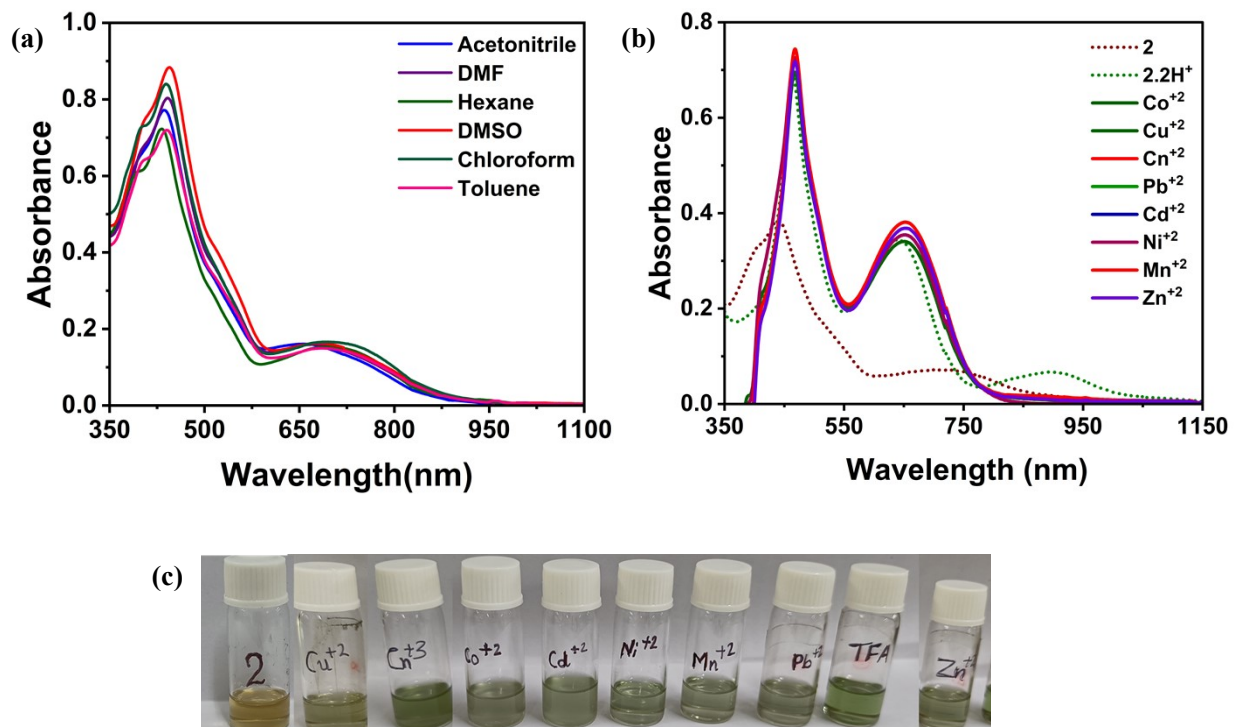

**Figure S22.** (a) Absorption spectra of macrocycle **2** ( $10^{-5}$ ) in various solvents. (b) Absorption spectra of macrocycle **2** in presence of various metal perchlorate salts (excess of equivalents) recorded in toluene solution. (c) Image of change in colour of solutions of macrocycle **2** in toluene after addition of various metal perchlorate salts.



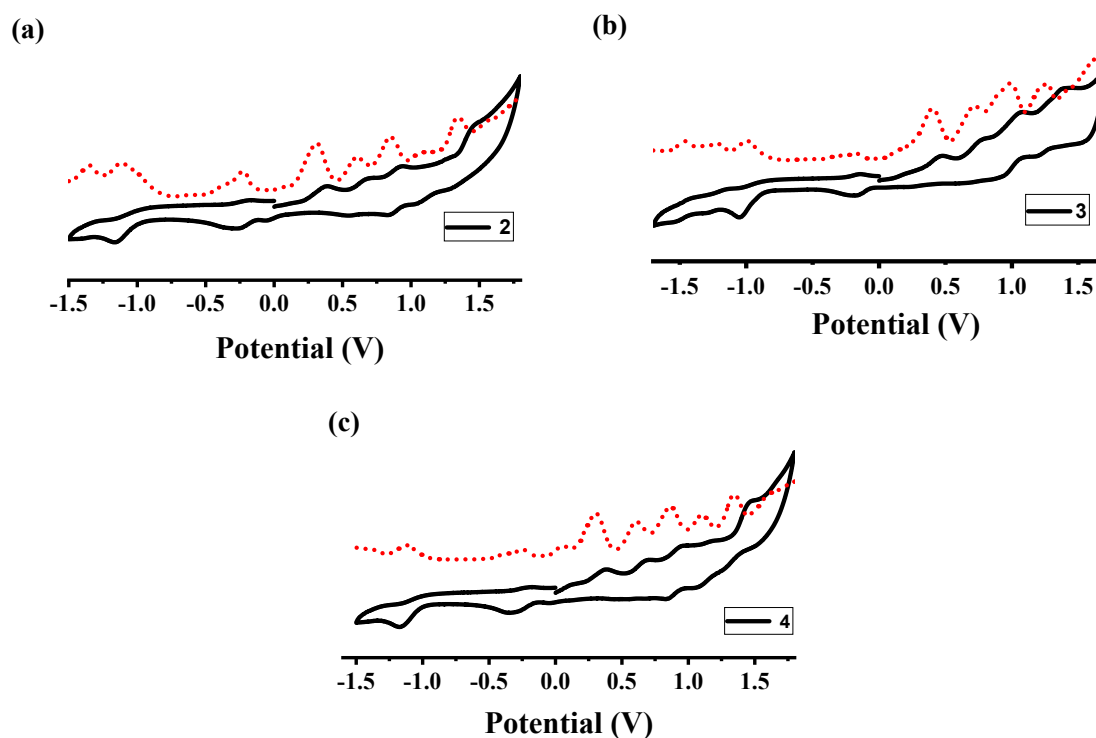

**Figure S23.** Cyclic voltammogram (black line) and differential pulse voltammogram (red dotted line) of compounds **2-4** (IUPAC convention has been followed for plotting Cyclic Voltammogram), recorded in  $\text{CH}_2\text{Cl}_2$  containing 0.1 M TBAP as the supporting electrolyte and  $10^{-3}$  M of the analyte at scan rates of  $50 \text{ mVs}^{-1}$  at  $25^\circ\text{C}$ . Saturated calomel electrode (SCE) was used as the reference electrode, glassy carbon as the working electrode and platinum wire as the auxiliary electrode.

**Table S1.** Selected TD-DFT calculated oscillator strengths and compositions of the major electronic transitions of **2**.

| <b>Wavelength (nm)</b> | <b>Osc. Strength</b> | <b>Major contributions</b>               | <b>Minor contributions</b>              |
|------------------------|----------------------|------------------------------------------|-----------------------------------------|
| 997.9341               | 0.3467               | H->L (98%)                               | H-1->L (2%)                             |
| 606.8393               | 0.3391               | H->L+1 (93%)                             | H-2->L (6%)                             |
| 588.24                 | 0.2465               | H-1->L (95%)                             | H->L+2 (2%)                             |
| 483.9696               | 0.1576               | H-3->L (16%), H->L+2 (80%)               |                                         |
| 460.8018               | 0.6619               | H-2->L (88%)                             | H-8->L (3%), H->L+1 (6%)                |
| 450.8977               | 0.3599               | H-3->L (77%), H->L+2 (14%)               | H-5->L (3%)                             |
| 429.1714               | 0.0093               | H-1->L+1 (96%)                           |                                         |
| 404.9097               | 0.0276               | H-8->L (19%), H-7->L (10%), H-4->L (62%) | H-3->L+1 (3%)                           |
| 398.1098               | 0.0855               | H-9->L (11%), H-6->L (42%), H-5->L (37%) | H-4->L+1 (3%), H-2->L+1 (3%)            |
| 395.7968               | 0.2499               | H-8->L (51%), H-4->L (28%)               | H-7->L (2%), H-3->L+1 (3%), H-2->L (5%) |
| 388.6259               | 0.0004               | H-9->L (27%), H-6->L (47%), H-5->L (11%) | H-3->L (3%), H-2->L+1 (5%)              |

**Table S2.** S<sub>0</sub> optimized geometry of compound **2** at B3LYP/6-31g (d,p) level of theory

# Sum of imaginary frequencies= 0

# Total Energy (Hartree) = -2817.047663.

| Atom | X        | Y        | Z        | Atom | X        | Y        | Z        |
|------|----------|----------|----------|------|----------|----------|----------|
| C    | 3.485225 | -3.72008 | -0.70719 | C    | -3.52998 | 4.766209 | 0.933601 |
| C    | 3.596611 | -2.60723 | 0.150311 | C    | 2.133999 | 4.690874 | -1.02629 |
| C    | 2.499994 | -2.3571  | 1.005435 | C    | 2.333757 | 6.058702 | -1.2194  |
| C    | 1.341984 | -3.12646 | 0.958593 | C    | 3.141399 | 6.800318 | -0.34974 |
| C    | 1.214369 | -4.1887  | 0.040263 | C    | 3.738663 | 6.128769 | 0.726643 |
| C    | 2.323606 | -4.48261 | -0.77233 | C    | 3.529551 | 4.766562 | 0.933158 |
| S    | 0.00009  | -2.81318 | 2.098707 | C    | -3.38345 | 8.273696 | -0.5708  |
| C    | -1.34176 | -3.12656 | 0.958573 | C    | 3.382784 | 8.273752 | -0.57202 |
| C    | -1.21406 | -4.18881 | 0.040251 | H    | 4.310579 | -3.95812 | -1.36936 |
| N    | 0.000189 | -4.90095 | -0.05256 | H    | 2.568632 | -1.55957 | 1.736268 |
| C    | -2.49982 | -2.35728 | 1.005388 | H    | 2.267871 | -5.28992 | -1.49304 |
| C    | -3.59639 | -2.60746 | 0.150215 | H    | -2.56854 | -1.55978 | 1.736237 |
| C    | -3.4849  | -3.72027 | -0.70731 | H    | -4.3102  | -3.95836 | -1.36953 |
| C    | -2.32324 | -4.48276 | -0.77239 | H    | -2.26743 | -5.29004 | -1.49312 |
| C    | 0.000252 | -6.15657 | -0.7915  | H    | 0.887281 | -6.7297  | -0.51353 |
| C    | 4.774983 | -1.72101 | 0.086824 | H    | -0.88672 | -6.72979 | -0.51353 |
| C    | -4.77482 | -1.72132 | 0.086724 | H    | 0.000244 | -6.01071 | -1.88223 |
| C    | -6.09291 | -2.32177 | -0.19348 | H    | 6.686229 | 0.551811 | 0.21564  |
| C    | -4.63315 | -0.34773 | 0.187158 | H    | 5.423088 | 2.902742 | 0.245802 |
| C    | 6.093123 | -2.32139 | -0.1933  | H    | 2.541362 | -0.14437 | 0.020896 |
| C    | 4.633208 | -0.34743 | 0.187186 | H    | -2.54133 | -0.1445  | 0.020869 |
| C    | 5.619067 | 0.716062 | 0.206839 | H    | -5.42329 | 2.902371 | 0.245893 |
| C    | 4.973098 | 1.920604 | 0.224209 | H    | -6.68624 | 0.55133  | 0.215603 |
| N    | 3.409214 | 0.305028 | 0.269922 | H    | -6.72499 | -0.84825 | -1.63304 |
| N    | -3.40921 | 0.304813 | 0.269967 | H    | -8.93722 | -1.86547 | -2.03611 |
| C    | -4.97322 | 1.920267 | 0.224279 | H    | -7.97322 | -5.04067 | 0.68376  |
| C    | -5.6191  | 0.715675 | 0.206841 | H    | -5.77281 | -4.00654 | 1.111641 |
| C    | -7.00894 | -1.74611 | -1.09447 | H    | 6.725145 | -0.84791 | -1.63293 |
| C    | -8.25336 | -2.32926 | -1.3291  | H    | 8.937453 | -1.86502 | -2.03589 |
| C    | -8.63064 | -3.51744 | -0.69155 | H    | 7.973563 | -5.04012 | 0.684141 |
| C    | -7.70927 | -4.11122 | 0.18446  | H    | 5.773092 | -4.00609 | 1.111923 |
| C    | -6.469   | -3.5302  | 0.428178 | H    | -9.92824 | -5.23013 | -0.93666 |
| C    | 7.00914  | -1.74572 | -1.0943  | H    | -10.6931 | -3.8546  | -0.13551 |
| C    | 8.253606 | -2.32881 | -1.32886 | H    | -10.4124 | -3.80475 | -1.88124 |
| C    | 8.630921 | -3.51694 | -0.69126 | H    | 9.928534 | -5.22959 | -0.93663 |
| C    | 7.709574 | -4.11072 | 0.184769 | H    | 10.41283 | -3.80396 | -1.88074 |
| C    | 6.469266 | -3.52976 | 0.428431 | H    | 10.69328 | -3.8543  | -0.13498 |
| C    | -9.98662 | -4.136   | -0.92822 | H    | 1.319618 | 0.189452 | 1.639217 |
| C    | 9.986933 | -4.13546 | -0.92788 | H    | -1.31959 | 0.189373 | 1.639272 |

|   |          |          |          |   |          |          |          |
|---|----------|----------|----------|---|----------|----------|----------|
| C | 1.142554 | 2.096039 | 0.518633 | H | -0.00013 | 3.721275 | -0.22635 |
| C | 0.697999 | 0.919758 | 1.14901  | H | -1.53533 | 4.129892 | -1.73836 |
| C | -0.69804 | 0.919723 | 1.149044 | H | -1.86506 | 6.556383 | -2.06387 |
| C | -1.14268 | 2.095985 | 0.518702 | H | -4.36364 | 6.685695 | 1.421641 |
| N | -9.2E-05 | 2.795684 | 0.173362 | H | -3.97868 | 4.269008 | 1.788066 |
| C | -2.48361 | 2.570137 | 0.28503  | H | 1.534997 | 4.129619 | -1.73871 |
| C | -2.72199 | 4.019664 | 0.059435 | H | 1.864451 | 6.556072 | -2.06461 |
| C | -3.54883 | 1.685053 | 0.262837 | H | 4.362928 | 6.686257 | 1.42094  |
| C | 2.483436 | 2.570274 | 0.284887 | H | 3.978265 | 4.269561 | 1.787732 |
| C | 2.721684 | 4.019795 | 0.059102 | H | -3.36279 | 8.825061 | 0.375897 |
| C | 3.54873  | 1.685276 | 0.262744 | H | -2.62805 | 8.702837 | -1.23691 |
| C | -2.13438 | 4.69097  | -1.02583 | H | -4.36693 | 8.447951 | -1.02695 |
| C | -2.33431 | 6.05882  | -1.21874 | H | 3.366938 | 8.824706 | 0.374983 |
| C | -3.14204 | 6.800194 | -0.34899 | H | 4.364216 | 8.447504 | -1.03278 |
| C | -3.73926 | 6.1284   | 0.727288 | H | 2.624613 | 8.703704 | -1.23446 |

## References

1. Sinha, A.; Ravikanth, M. Phenothiazine-Embedded Hexaphyrins. *Org. Lett.* **2022**, *24*, 1335–1340.
2. Marin, L.; Bejan, A.; Ailincai, D.; Belei, D. Poly (Azomethine-Phenothiazines) with Efficient Emission in Solid State. *Eur. Polym. J.* **2017**, *95*, 127–137.
3. Yang, C.-J.; Chang, Y.J.; Watanabe, M.; Hon, Y.-S.; Chow, T.J. Phenothiazine derivatives as Organic Sensitizers for Highly Efficient Dye-Sensitized Solar Cells. *J. Mater. Chem.* **2012**, *22*, 4040-4049.
4. Srinivasan, A.; Reddy, V. R. M.; Jeyaprakash Narayanan, S.; Sridevi, B.; Pushpan, S. K.; Ravikumar, M.; Chandrashekar, T. K. Tetrathia- and Tetraoxarubyrins: Aromatic, Core-Modified, Expanded Porphyrins. *Angew. Chem. Int. Ed.* **1997**, *36*, 2598–2601.
5. Ghosh, A.; Maity, D. K.; Ravikanth, M. Aluminium(III) Porphyrin Based Axial-Bonding Type Dyads Containing Thiaporphyrins and Expanded Thiaporphyrins as Axial Ligands. *New J. Chem.* **2012**, *36*, 2630–2641.

6. Frisch, M. J.; Trucks, G. W.; Schlegel, H. B.; Scuseria, G. E.; Robb, M. A.; Cheeseman, J. R.; Scalmani, G.; Barone, V.; Mennucci, B.; Petersson, G. A.; et al. Gaussian 09 C.01; Gaussian Inc.: Wallingford CT, **2009**.
7. Treutler, O.; Ahlrichs, R. Efficient Molecular Numerical Integration Schemes. *J. Chem. Phys.* **1995**, *102*, 346–354.
8. Becke, A. D. A New Mixing of Hartree–Fock and Local Density-Functional Theories. *J. Chem. Phys.* **1993**, *98*, 1372–1377.
9. Hehre, W. J. Ab Initio Molecular Orbital Theory. *Acc. Chem. Res.* **1976**, *9*, 399–406.
10. Tomasi, J.; Mennucci, B.; Cammi, R. Quantum Mechanical Continuum Solvation Models. *Chem. Rev.* **2005**, *105*, 2999–3093.
